# Supplementary material for: The impact of free-roaming pigs on arthropod diversity: a field survey in four European countries
Source: Research Square preprint supplement (doi:10.21203/rs.3.rs-8310948/v1), 2026-01-14
Supplement: Supplementary file 1 [file 3c40e21b460c7321ae0c1589.docx]

**Supplementary material for**

Wibe A*,Pindpo M, Bochicchio D, Plut J, Štukelj M, Kongsted AG, Pedersen AC, Mejer H, Thamsborg SM (2026)The impact of free-roaming pigs on arthropod diversity: a field survey in four European countries. Journal of Insect Conservation.

*Norwegian Centre for Organic Agriculture, Gunnars veg 6, 6630 Tingvoll, Norway

atle.wibe@norsok.no

**Metabarcoding arthropods**

*Analysis of the Norwegian and Danish samples:*

The identification of the captured arthropods in Norway and Danmark was done using DNA metabarcoding of the bulk samples by the Centre for Biodiversity Genetics (NINAGEN) at the Norwegian Institute for Nature Research (NINA), Trondheim, Norway (Åström et al. 2023). In this analysis, NINAGEN followed the non-destructive metabarcoding protocol for analysis of bulk insect samples as described by Iwaszkiewicz-Eggebrecht et al. (2023). This protocol includes a soft lysis of the insects by removing the ethanol and adding a mix of ATL‐buffer (Qiagen) and proteinase‐K (100mL ATL = 1mL proteinase‐K) with incubation at 56°C for 3.5 hours. After lysis, DNA is extracted using 200 μL of the lysis buffer in a Blood & Tissue Kit (Qiagen) following standard protocols.

The DNA extracts were subject to metabarcoding of the COI gene region using the BF3-BR2 primer set, which provides good taxonomic resolution in arthropod metabarcoding (Elbrecht et al., 2019). A standard two-step Ilumina protocol were used to generate DNA libraries for metabarcoding (Bohmann et al., 2022). An initial PCR reaction included BF3-BR2 primers with ‘overhang adapter’ sequences and was followed by a second PCR reaction that appended Illumina Nextera indices (Table S1). PCR products purified after each PCR reaction using a 1:1 ratio of magnetic beads (MAGBIND RXN PURE PLUS) to sample. The samples were then normalized, pooled and sequenced with 2 × 250bp on an Illumina NovaSeq 6000 machine at the Norwegian Sequencing Centre (NSC) at the University of Oslo.

Bioinformatic processing included removal of primers using cutadapt v2.1. (Martin, 2011)), and further processing using DADA2 v1. (Callahan et al., 2016) to generate Amplicon Sequence Variants (ASVs). Taxonomic assignment of species was done by using RDP-Classifier (Wang et al., 2007) and a trained database based on Porter and Hajibabaei (2018). The database was modified by adding ca. 7000 sequences representing Norwegian arthropods.

*Analysis of the Italian and Slovenian samples:*

The Identification of the arthropods collected in Italy and Slovenia was carried out by the Sequencing Platform of the Unit of Computational Biology, Research and Innovation Centre, Fondazione Edmund Mach (FEM), Via E. Mach 1, 38010 San Michele all'Adige, Italy. In this analysis, the collected arthropods were pooled, and total DNA was extracted using the Macherey-Nagel NucleoSpin Soil Kit, following the manufacturer’s instructions.

Metazoan species identification was performed by sequencing the cytochrome c oxidase subunit 1 (COI) gene using the primers mlCOIintF (5’-GGWACWGGWTGAACWGTWTAYCCYCC-3’) and dgHCO2198 (5’-TAAACTTCAGGGTGACCAAARAAYCA-3’) (Leray et al., 2013). Each sample was amplified in a 25 µL PCR reaction containing 2.5 µL of 10× Gold Buffer (Thermo Fisher Scientific), 0.2 µL of AmpliTaq Gold DNA Polymerase (5 U/µL, Thermo Fisher Scientific), 0.75 µL of each primer (10 µM), and 3 µL of template DNA (5–20 ng/µL). PCR reactions were performed in a GeneAmp PCR System 9700 (Thermo Fisher Scientific) with the following cycling conditions: an initial denaturation at 95 °C for 10 min; 16 cycles at 95 °C for 10 s, 62 °C for 30 s, and 72 °C for 60 s, decreasing the annealing temperature by 1 °C per cycle; followed by 25 cycles at 95 °C for 10 s, 46 °C for 30 s, and 72 °C for 60 s, decreasing the annealing temperature by 0.2 °C per cycle; and a final extension at 72 °C for 5 min.

Raw reads were processed using the MICCA software (v1.7.2) (Albanese et al., 2015). Paired-end reads were merged with VSEARCH (https://github.com/torognes/vsearch) using a minimum overlap length of 100 bp and a maximum of 32 allowed mismatches. Primers were trimmed with Cutadapt v1.18 (Martin, 2011) and merged reads shorter than 100 bp or longer than 300 bp, or with an expected error rate greater than 0.25%, were discarded. Filtered sequences were clustered into Amplicon Sequence Variants (ASVs) using the UNOISE algorithm (https://doi.org/10.1101/081257) implemented in MICCA. Taxonomic assignment was performed using the RDP Classifier v2.13 (Wang et al., 2007) against the Eukaryote COI reference set (release v5.0.1; Porter & Hajibabaei, 2018).

**Study sites and sampling**

Insects were sampled in paired plots located in Norway, Denmark (DK1 and DK2), Italy, and Slovenia during 2022 and 2023. Each pair consisted of one area where pigs were present (“Pig area”) and a nearby control area without pig activity (“Non-pig area”). Sampling lasted approximately 26-36 days per site and season.
Identified insects were grouped to order level (e.g., Diptera, Coleoptera, Hemiptera, Hymenoptera, Lepidoptera, etc.). Counts of individuals in each order were compiled for every site × treatment × year combination.

**Supplementary Table 1** Brief description of the organic farms hosting the arthropod samplings.

| **Trap Location** | **Pig farm established** | **No. pigs free roaming** | **Area for roaming** | **Pig density** | **Vegetation description** |
| --- | --- | --- | --- | --- | --- |
| Norway | 2016 | 200 | 9 ha | 22,2 pigs/ha | Young forest, mixed spruce and deciduous trees (growers/finishing pigs/sows), open pastures (only for sows) |
| Denmark, DK1 | 2012 | 5001 | 102 ha | 4.9 pigs/ha | Pasture with approx. 30% tree cover, sows part of crop rotation |
| Denmark, DK2 | 1993 | 6501 | 333 ha | 2.0 pigs/ha | Pasture with approx. 20% tree cover, sows part of crop rotation. |
| Italy | 2014 | 300 | 48 ha | 6.25 pigs/ha | Woods and open pastures (cultivated or natural) |
| Slovenia | 2000 | 20 | 3.5 ha | 5.7 pigs/ha | Paddocks with partial tree and shrub cover (deciduous) and pasture (fatteners only). |

1 Yearly sow units

**Statistical analysis**

Taxa with zero counts in both treatments for a given location–year were excluded to avoid undefined expected frequencies. Data were organized in contingency tables (rows = taxa; columns = treatments).

For each location × year, a Pearson’s Chi-square test of independence was used to test whether insect order composition and the relative distribution of insect orders differed and between the treatments “Pig area” and “Non-pig area”. The test statistic was calculated as:

where O and E represent observed and expected counts, respectively.
Standardized residuals were examined to identify which taxa contributed most to the differences (positive = over-represented, negative = under-represented). Significance was assessed at α = 0.05.

The statistical analyses were carried out in R (R Core Team 2025). To support workflow efficiency, ChatGPT (OpenAI, GPT-5.1, accessed November 2025) was used to generate draft R code for statistical analyses for the Pearson’s Chi-square tests. All code was verified, adapted, and executed by the authors, and all statistical interpretations and decisions were made solely by the authors.

**Supplementary Table 2** Number of species in each order at each location with treatment “Pig area” and “Non-pig area” in 2022 and 2023.

| Location | Norway | Norway | Norway | Norway | Denmark DK1 | Denmark DK1 | Denmark DK2 | Denmark DK2 | Italy | Italy | Italy | Italy | Slovenia | Slovenia | Slovenia | Slovenia |
| --- | --- | --- | --- | --- | --- | --- | --- | --- | --- | --- | --- | --- | --- | --- | --- | --- |
| Year | 2022 | 2022 | 2023 | 2023 | 2023 | 2023 | 2023 | 2023 | 2022 | 2022 | 2023 | 2023 | 2022 | 2022 | 2023 | 2023 |
| Treatment | Pig area | Non-pig area | Pig area | Non-pig area | Pig area | Non-pig area | Pig area | Non-pig area | Pig area | Non-pig area | Pig area | Non-pig area | Pig area | Non-pig area | Pig area | Non-pig area |
| Araneae | 7 | 8 | 4 | 7 | 3 | 5 | 8 | 10 | 0 | 0 | 0 | 1 | 1 | 1 | 1 | 1 |
| Blattodea | 1 | 1 | 1 | 1 | 0 | 0 | 0 | 0 | 0 | 0 | 0 | 0 | 1 | 1 | 0 | 0 |
| Coleoptera | 21 | 7 | 21 | 16 | 13 | 19 | 15 | 11 | 17 | 29 | 5 | 17 | 42 | 39 | 12 | 14 |
| Diptera | 532 | 427 | 497 | 460 | 382 | 472 | 253 | 143 | 139 | 109 | 99 | 87 | 145 | 136 | 102 | 104 |
| Entomobryomorpha | 0 | 2 | 1 | 1 | 2 | 1 | 0 | 0 | 0 | 0 | 0 | 0 | 0 | 0 | 0 | 0 |
| Ephemeroptera | 0 | 0 | 3 | 1 | 1 | 1 | 0 | 0 | 0 | 0 | 0 | 0 | 0 | 0 | 0 | 0 |
| Hemiptera | 21 | 26 | 32 | 26 | 48 | 64 | 33 | 31 | 10 | 14 | 3 | 3 | 1 | 1 | 2 | 5 |
| Hymenoptera | 72 | 126 | 100 | 167 | 120 | 188 | 51 | 44 | 22 | 30 | 10 | 19 | 1 | 1 | 19 | 22 |
| Lepidoptera | 29 | 42 | 85 | 91 | 102 | 117 | 34 | 38 | 43 | 59 | 12 | 21 | 1 | 1 | 17 | 20 |
| Mecoptera | 1 | 2 | 2 | 2 | 2 | 2 | 0 | 1 | 0 | 0 | 0 | 0 | 1 | 1 | 1 | 1 |
| Mesostigmata | 1 | 0 | 0 | 0 | 0 | 0 | 0 | 0 | 0 | 0 | 0 | 0 | 0 | 0 | 0 | 0 |
| Neuroptera | 0 | 0 | 5 | 2 | 1 | 3 | 0 | 1 | 2 | 2 | 0 | 0 | 1 | 1 | 0 | 0 |
| Odonata | 0 | 0 | 0 | 0 | 0 | 1 | 0 | 0 | 0 | 0 | 0 | 0 | 1 | 1 | 0 | 0 |
| Opiliones | 0 | 0 | 1 | 1 | 3 | 2 | 1 | 2 | 0 | 0 | 0 | 0 | 0 | 0 | 0 | 0 |
| Orthoptera | 1 | 0 | 1 | 0 | 1 | 0 | 1 | 0 | 0 | 2 | 0 | 0 | 1 | 1 | 0 | 0 |
| Plecoptera | 5 | 5 | 4 | 5 | 0 | 0 | 0 | 0 | 0 | 0 | 0 | 0 | 0 | 0 | 0 | 0 |
| Psocoptera | 1 | 3 | 3 | 3 | 11 | 12 | 5 | 3 | 0 | 0 | 1 | 1 | 0 | 0 | 0 | 0 |
| Raphidioptera | 0 | 1 | 0 | 0 | 0 | 0 | 0 | 0 | 0 | 0 | 0 | 0 | 0 | 0 | 0 | 0 |
| Symphypleona | 1 | 1 | 1 | 0 | 0 | 1 | 0 | 0 | 0 | 0 | 0 | 0 | 0 | 0 | 0 | 0 |
| Strepsiptera | 0 | 0 | 0 | 0 | 0 | 0 | 1 | 0 | 0 | 0 | 0 | 0 | 0 | 0 | 0 | 0 |
| Thysanoptera | 0 | 0 | 1 | 1 | 1 | 3 | 0 | 0 | 0 | 0 | 0 | 0 | 0 | 0 | 0 | 0 |
| Trichoptera | 1 | 1 | 1 | 2 | 3 | 4 | 2 | 2 | 0 | 0 | 1 | 0 | 0 | 0 | 0 | 2 |
| Trombidiformes | 1 | 2 | 1 | 1 | 1 | 3 | 2 | 2 | 0 | 0 | 0 | 0 | 0 | 0 | 0 | 0 |

**Supplementary Table 3** Number of “reads” of each order at each location with treatment “Pig area” and “Non-pig area” in 2022 and 2023.

| Location | Norway | Norway | Norway | Norway | Denmark DK1 | Denmark DK1 | Denmark DK2 | Denmark DK2 | Italy | Italy | Italy | Italy | Slovenia | Slovenia | Slovenia | Slovenia |
| --- | --- | --- | --- | --- | --- | --- | --- | --- | --- | --- | --- | --- | --- | --- | --- | --- |
| Year | 2022 | 2022 | 2023 | 2023 | 2023 | 2023 | 2023 | 2023 | 2022 | 2022 | 2023 | 2023 | 2022 | 2022 | 2023 | 2023 |
| Treatment | Pig area | Non-pig area | Pig area | Non-pig area | Pig area | Non-pig area | Pig ara | Non-pig area | Pig area | Non-pig area | Pig ara | Non-pig area | Pig area | Non-pig area | Pig ara | Non-pig area |
| Araneae | 293 | 132 | 86 | 173 | 131 | 581 | 1494 | 7536 | 0 | 0 | 0 | 15575 | 0 | 17 | 3 | 42 |
| Blattodea | 282 | 618 | 9 | 29 | 0 | 0 | 0 | 0 | 0 | 12 | 0 | 0 | 0 | 0 | 0 | 0 |
| Coleoptera | 1850 | 510 | 1359 | 250 | 532 | 326 | 1218 | 6000 | 618 | 4684 | 208 | 6605 | 571 | 1166 | 611 | 986 |
| Diptera | 406802 | 153096 | 129065 | 94635 | 93650 | 106733 | 244136 | 280241 | 44842 | 15321 | 10889 | 4166 | 59662 | 54314 | 27099 | 16861 |
| Entomobryomorpha | 0 | 1242 | 53 | 10 | 1694 | 759 | 0 | 0 | 0 | 0 | 0 | 0 | 0 | 0 | 0 | 0 |
| Ephemeroptera | 0 | 0 | 16 | 49 | 188 | 694 | 0 | 0 | 0 | 0 | 0 | 0 | 0 | 0 | 0 | 0 |
| Hemiptera | 8739 | 79816 | 9640 | 6869 | 3087 | 6982 | 11988 | 22704 | 502 | 1001 | 305 | 351 | 328 | 468 | 13 | 1063 |
| Hymenoptera | 8409 | 9420 | 5161 | 9182 | 21934 | 36868 | 11305 | 54855 | 463 | 3584 | 142 | 366 | 320 | 952 | 397 | 1901 |
| Lepidoptera | 31215 | 20666 | 64809 | 49373 | 112889 | 195689 | 162085 | 215502 | 3691 | 19928 | 206 | 505 | 801 | 2425 | 477 | 2089 |
| Mecoptera | 40 | 5007 | 785 | 3826 | 359 | 178 | 0 | 306 | 0 | 0 | 0 | 33 | 0 | 39 | 8 | 170 |
| Mesostigmata | 5 | 0 | 0 | 0 | 0 | 0 | 0 | 0 | 0 | 0 | 0 | 0 | 0 | 0 | 0 | 0 |
| Neuroptera | 0 | 0 | 122 | 104 | 160 | 280 | 0 | 46 | 9 | 118 | 0 | 0 | 0 | 20 | 0 | 0 |
| Odonata | 0 | 0 | 0 | 0 | 0 | 2509 | 0 | 0 | 14 | 0 | 0 | 0 | 0 | 0 | 0 | 0 |
| Opiliones | 0 | 0 | 12 | 2435 | 9440 | 47031 | 14087 | 15658 | 0 | 0 | 0 | 0 | 0 | 0 | 0 | 0 |
| Orthoptera | 26 | 0 | 20 | 0 | 5 | 0 | 93 | 0 | 0 | 463 | 0 | 0 | 0 | 35 | 0 | 0 |
| Plecoptera | 2149 | 5280 | 1300 | 1232 | 0 | 0 | 0 | 0 | 0 | 0 | 0 | 0 | 0 | 0 | 0 | 0 |
| Psocoptera | 272 | 82 | 52 | 66 | 4215 | 6229 | 4670 | 3786 | 0 | 0 | 4 | 32 | 0 | 0 | 0 | 0 |
| Strepsiptera | 0 | 0 | 0 | 0 | 0 | 0 | 204 | 0 | 0 | 0 | 0 | 0 | 0 | 0 | 0 | 0 |
| Symphypleona | 31 | 111 | 6 | 0 | 0 | 50 | 0 | 0 | 0 | 0 | 0 | 0 | 0 | 0 | 0 | 0 |
| Raphidioptera | 0 | 33 | 0 | 0 | 0 | 0 | 0 | 0 | 0 | 0 | 0 | 0 | 0 | 0 | 0 | 0 |
| Thysanoptera | 0 | 0 | 2 | 5 | 12 | 19 | 0 | 0 | 0 | 0 | 0 | 0 | 0 | 0 | 0 | 0 |
| Trichoptera | 203 | 83 | 245 | 57 | 340 | 96 | 182 | 4166 | 0 | 0 | 74 | 7 | 0 | 0 | 0 | 78 |
| Trombidiformes | 40 | 15 | 17 | 2 | 2 | 64 | 70 | 112 | 0 | 0 | 0 | 0 | 0 | 0 | 0 | 0 |

**The R code for the analysis of the insect order composition is shown below:**

# ==============================

# Pearson's Chi-square analysis (Orders-2.xlsx)

# By pig area vs Non-pig area, per Location × Year

# ==============================

# ---- Packages ----

suppressPackageStartupMessages({

library(readxl)

library(dplyr)

library(tidyr)

library(stringr)

library(purrr)

library(readr)

})

# ---- Input ----

excel_path <- "Orders-2.xlsx" # adjust path if needed

sheet_name <- "Ark1"

# ---- Read & inspect ----

raw <- readxl::read_excel(excel_path, sheet = sheet_name, col_names = TRUE)

# Structure in Orders-2.xlsx:

# Row 1 (index 0 in Python terms): Year

# Row 2: Treatment ("By pig area", "Non-pig area")

# Column 1: Taxon names (header often "Unnamed: 0")

meta <- raw[1:2, , drop = FALSE] # year, treatment

counts <- raw[-(1:2), , drop = FALSE] # taxa counts

colnames(counts) <- colnames(raw) # keep column names

taxon_col <- colnames(counts)[1] # usually "Unnamed: 0"

# ---- Build tidy dataframe: Year, Location, Treatment, Taxon, Count ----

make_col_tbl <- function(j) {

col_name <- colnames(counts)[j]

year_val <- as.character(meta[[j]][1])

treat_val <- as.character(meta[[j]][2])

location <- sub("\\..*$", "", col_name) # "Norway.1" -> "Norway"

tibble(

Year = year_val,

Location = location,

Treatment = treat_val,

Taxon = counts[[taxon_col]],

Count = suppressWarnings(as.numeric(counts[[j]]))

)

}

tidy_df <- map_dfr(2:ncol(counts), make_col_tbl) %>%

mutate(

Treatment = recode(Treatment, "By pig ara" = "By pig area"),

Year = str_squish(Year),

Location = str_squish(Location),

Treatment = str_squish(Treatment),

Taxon = str_squish(Taxon)

)

# ---- Chi-square helper for one Location × Year ----

chi_sq_one <- function(loc, yr, data = tidy_df, top_n = 5) {

sub <- data %>% filter(Location == loc, Year == as.character(yr))

if (nrow(sub) == 0) return(NULL)

mat <- sub %>%

select(Taxon, Treatment, Count) %>%

pivot_wider(names_from = Treatment, values_from = Count, values_fill = 0)

# Exclude taxa with all-zero counts across treatments

mat <- mat %>% filter(rowSums(across(where(is.numeric))) > 0)

if (nrow(mat) < 2 || ncol(mat) < 3) return(NULL) # need >=2 taxa and both treatments

obs <- as.matrix(mat %>% select(-Taxon))

rownames(obs) <- mat$Taxon

chi <- suppressWarnings(chisq.test(obs, correct = FALSE))

# Standardized residuals and contributions

expct <- chi$expected

std_res <- (obs - expct) / sqrt(expct)

contrib_total <- rowSums(abs(std_res))

top_taxa <- names(sort(contrib_total, decreasing = TRUE))[seq_len(min(top_n, length(contrib_total)))]

tibble(

Location = loc,

Year = as.character(yr),

Chi2 = unname(chi$statistic),

df = unname(chi$parameter),

p_value = unname(chi$p.value),

Top_contributing_taxa = paste(top_taxa, collapse = ", ")

)

}

# ---- Run across all Location × Year combinations ----

locs <- sort(unique(tidy_df$Location))

yrs <- sort(unique(tidy_df$Year))

chi_summary <- map_dfr(locs, function(loc) {

map_dfr(yrs, function(yr) chi_sq_one(loc, yr))

}) %>%

arrange(Location, Year)

# Print and save

print(chi_summary, n = Inf)

readr::write_csv(chi_summary, "chi_square_summary_by_location_year_orders.csv")

# ---- Standardized residuals table for any Location × Year ----

# Positive residual = over-represented in that treatment; negative = under-represented.

standardized_residuals_table <- function(loc, yr, data = tidy_df) {

sub <- data %>% filter(Location == loc, Year == as.character(yr))

if (nrow(sub) == 0) {

message("No data for that location-year.")

return(invisible(NULL))

}

mat <- sub %>%

select(Taxon, Treatment, Count) %>%

pivot_wider(names_from = Treatment, values_from = Count, values_fill = 0) %>%

filter(rowSums(across(where(is.numeric))) > 0)

if (nrow(mat) < 2 || ncol(mat) < 3) {

message("Too few taxa or missing a treatment after filtering.")

return(invisible(NULL))

}

obs <- as.matrix(mat %>% select(-Taxon))

rownames(obs) <- mat$Taxon

chi <- suppressWarnings(chisq.test(obs, correct = FALSE))

expct <- chi$expected

std_res <- (obs - expct) / sqrt(expct)

contrib_total <- rowSums(abs(std_res))

out <- as_tibble(std_res, rownames = "Taxon") %>%

mutate(`Total contribution` = contrib_total) %>%

arrange(desc(`Total contribution`))

return(out)

}

# ---- Optional: export residuals for all combos (set signif_only = TRUE to export only p < 0.05) ----

export_all_residuals <- function(out_dir = "residual_tables_orders", signif_only = FALSE, alpha = 0.05) {

dir.create(out_dir, showWarnings = FALSE, recursive = TRUE)

# Build a quick lookup from chi_summary

key <- chi_summary %>%

transmute(Location, Year, p_value)

walk(locs, function(loc) {

walk(yrs, function(yr) {

p_row <- key %>% filter(Location == loc, Year == yr)

if (nrow(p_row) == 0) return(NULL)

if (signif_only && p_row$p_value[1] >= alpha) return(NULL)

tbl <- standardized_residuals_table(loc, yr)

if (is.null(tbl)) return(NULL)

fn <- file.path(out_dir, paste0("std_residuals_", loc, "_", yr, ".csv"))

readr::write_csv(tbl, fn)

})

})

invisible(TRUE)

}

# ---- Examples (uncomment to run interactively) ----

# standardized_residuals_table("Norway", 2022) %>% print(n = 20)

# export_all_residuals(signif_only = TRUE, alpha = 0.05)

# export_all_residuals(signif_only = FALSE)

**The R code for the analysis of relative distribution of arthropod orders (“reads”) is shown below:**

# ==============================

# Pearson's Chi-square analysis: By pig area vs Non-pig area

# - Reads your Excel ("Reads.xlsx", sheet "Ark1")

# - Reshapes to tidy format

# - For each Location × Year:

# * builds a taxa × treatment contingency table

# * excludes taxa with all-zero counts (within that Location-Year)

# * runs chisq.test (Pearson, no Yates correction)

# * extracts χ², df, p, and top contributing taxa (std. residuals)

# - Provides a function to inspect standardized residuals for any site-year

# - Saves a CSV summary

# ==============================

# ---- Packages ----

suppressPackageStartupMessages({

library(readxl)

library(dplyr)

library(tidyr)

library(purrr)

library(stringr)

library(readr)

})

# ---- Input ----

excel_path <- "Reads.xlsx" # adjust path if needed

sheet_name <- "Ark1"

# ---- Read & reshape ----

raw <- readxl::read_excel(excel_path, sheet = sheet_name, col_names = TRUE)

# Row 1: Location labels; Row 2: Treatment labels. Data begins on row 3.

meta <- raw[1:2, , drop = FALSE]

counts <- raw[-(1:2), , drop = FALSE]

# Ensure column names are intact (first column header is "Year" in your file and holds taxa names)

colnames(counts) <- colnames(raw)

# Build tidy dataframe with columns: Year, Location, Treatment, Taxon, Count

make_col_tbl <- function(j) {

# column names look like "2022", "2022.1", "2023.4" etc; base year is before the dot

year_base <- gsub("\\..*$", "", colnames(counts)[j])

tibble(

Year = as.character(year_base),

Location = as.character(meta[[j]][1]),

Treatment = as.character(meta[[j]][2]),

Taxon = counts[[1]],

Count = suppressWarnings(as.numeric(counts[[j]]))

)

}

tidy_df <- map_dfr(2:ncol(counts), make_col_tbl) %>%

mutate(

# fix treatment typos

Treatment = dplyr::recode(Treatment,

"By pig ara" = "By pig area"),

# harmonize whitespace just in case

Treatment = str_squish(Treatment),

Location = str_squish(Location),

Taxon = str_squish(Taxon)

)

# ---- Core helper: chi-square per location-year ----

chi_sq_one <- function(loc, yr, data = tidy_df, top_n = 5) {

sub <- data %>% filter(Location == loc, Year == as.character(yr))

if (nrow(sub) == 0) return(NULL)

mat <- sub %>%

select(Taxon, Treatment, Count) %>%

pivot_wider(names_from = Treatment, values_from = Count, values_fill = 0)

# Keep only taxa with any counts across treatments

mat <- mat %>% filter(rowSums(across(where(is.numeric))) > 0)

# If fewer than 2 taxa remain, the test is not meaningful

if (nrow(mat) < 2) return(NULL)

obs <- as.matrix(mat %>% select(-Taxon))

rownames(obs) <- mat$Taxon

chi <- suppressWarnings(chisq.test(obs, correct = FALSE))

# Standardized residuals and per-taxon total contribution (L1 norm)

expct <- chi$expected

std_res <- (obs - expct) / sqrt(expct)

contrib_total <- rowSums(abs(std_res))

top_ordered <- names(sort(contrib_total, decreasing = TRUE))

top_taxa <- paste(head(top_ordered, top_n), collapse = ", ")

tibble(

Location = loc,

Year = as.character(yr),

Chi2 = unname(chi$statistic),

df = unname(chi$parameter),

p_value = unname(chi$p.value),

Top_contributing_taxa = top_taxa

)

}

# ---- Run across all Location × Year combinations ----

locs <- sort(unique(tidy_df$Location))

yrs <- sort(unique(tidy_df$Year))

chi_summary <- map_dfr(locs, function(loc) {

map_dfr(yrs, function(yr) chi_sq_one(loc, yr))

}) %>%

arrange(Location, Year)

# Print and save

print(chi_summary, n = Inf)

readr::write_csv(chi_summary, "chi_square_summary_by_location_year.csv")

# ---- Inspect standardized residuals for a chosen site-year ----

# Positive residual = over-represented in that treatment; negative = under-represented.

standardized_residuals_table <- function(loc, yr, data = tidy_df) {

sub <- data %>% filter(Location == loc, Year == as.character(yr))

if (nrow(sub) == 0) {

message("No data for that location-year.")

return(invisible(NULL))

}

mat <- sub %>%

select(Taxon, Treatment, Count) %>%

pivot_wider(names_from = Treatment, values_from = Count, values_fill = 0) %>%

filter(rowSums(across(where(is.numeric))) > 0)

if (nrow(mat) < 2) {

message("Too few taxa after filtering.")

return(invisible(NULL))

}

obs <- as.matrix(mat %>% select(-Taxon))

rownames(obs) <- mat$Taxon

chi <- suppressWarnings(chisq.test(obs, correct = FALSE))

expct <- chi$expected

std_res <- (obs - expct) / sqrt(expct)

# Rank by total absolute residual across treatments

contrib_total <- rowSums(abs(std_res))

out <- as_tibble(std_res, rownames = "Taxon") %>%

mutate(`Total contribution` = contrib_total) %>%

arrange(desc(`Total contribution`))

return(out)

}

# ---- Example usage (uncomment to run interactively) ----

# standardized_residuals_table("Norway", 2022) %>% print(n = 20)

# standardized_residuals_table("Italy", 2023) %>% print(n = 20)

# standardized_residuals_table("DK2", 2023) %>% print(n = 20)

# ---- Notes ----

# * The test assesses differences in *composition* between treatments.

# * Extremely large totals can inflate χ²; standardized residuals identify which taxa drive the signal.

# * If any expected counts are very small, consider either aggregating rare taxa or using:

# chisq.test(obs, simulate.p.value = TRUE, B = 10000)

**References**

Bohmann, K., Elbrecht, V., Carøe, C., Bista, I., Leese, F., Bunce, M., Yu, D. W., Seymour, M., Dumbrell, A. J., & Creer, S. (2022). Strategies for sample labelling and library preparation in DNA metabarcoding studies. *Molecular Ecology Resources*, *22*(4), 1231-1246. https://doi.org/https://doi.org/10.1111/1755-0998.13512

Callahan, B. J., McMurdie, P. J., Rosen, M. J., Han, A. W., Johnson, A. J. A., & Holmes, S. P. (2016). DADA2: High-resolution sample inference from Illumina amplicon data. *Nature Methods*, *13*(7), 581-583. https://doi.org/10.1038/nmeth.3869

Elbrecht, V., Braukmann, T. W. A., Ivanova, N. V., Prosser, S. W. J., Hajibabaei, M., Wright, M., Zakharov, E. V., Hebert, P. D. N., & Steinke, D. (2019). Validation of COI metabarcoding primers for terrestrial arthropods. *PeerJ*, *7*, e7745. https://doi.org/10.7717/peerj.7745

Iwaszkiewicz-Eggebrecht, E., Granqvist, E., Buczek, M., Prus, M., Kudlicka, J., Roslin, T., Tack, A. J. M., Andersson, A. F., Miraldo, A., Ronquist, F., & Łukasik, P. (2023). Optimizing insect metabarcoding using replicated mock communities. *Methods in Ecology and Evolution*, *14*(4), 1130-1146. https://doi.org/https://doi.org/10.1111/2041-210X.14073

Martin, M. (2011). Cutadapt removes adapter sequences from high-throughput sequencing reads [next generation sequencing; small RNA; microRNA; adapter removal]. *2011*, *17*(1), 3. https://doi.org/10.14806/ej.17.1.200

Porter, T. M., & Hajibabaei, M. (2018). Over 2.5 million COI sequences in GenBank and growing. *PLoS One*, *13*(9), e0200177. https://doi.org/10.1371/journal.pone.0200177

R Core Team (2025). _R: A Language and Environment for Statistical Computing_. R Foundation for Statistical Computing, Vienna, Austria. https://www.R-project.org/

Wang, Q., Garrity, G. M., Tiedje, J. M., & Cole, J. R. (2007). Naïve Bayesian Classifier for Rapid Assignment of rRNA Sequences into the New Bacterial Taxonomy. *Applied and Environmental Microbiology*, *73*(16), 5261-5267. https://doi.org/doi:10.1128/AEM.00062-07
